# Supplementary material for: Cu oxidation kinetics through graphene and its effect on the electrical properties of graphene
Source: Royal Society of Chemistry journal article supplement (doi:10.1039/d0ra06301k), 2020-01-01
Supplement: d0ra06301k1.pdf [file d0ra06301k1.pdf]

Supporting Information for

# Cu oxidation kinetics through graphene and its effect on electrical properties of graphene

*Min-Sik Kim<sup>a,+</sup>, Ki-Ju Kim<sup>a,+</sup>, Minsu Kim<sup>a</sup>, Sangbong Lee<sup>a</sup>, Kyu Hyun Lee<sup>c</sup>, Hyeongkeun Kim<sup>c</sup>,  
Hyun-Mi Kim<sup>c,\*</sup>, and Ki-Bum Kim<sup>a,b,\*</sup>*

<sup>a</sup> Department of Materials Science and Engineering, Seoul National University, 1 Gwanak-ro,  
Gwanak-gu, Seoul, 08826, South Korea

<sup>b</sup> Research Institute of Advanced Materials, Seoul National University, 1 Gwanak-ro,  
Gwanak-gu, Seoul, 08826, South Korea

<sup>c</sup> Korea Electronics Technology Institute, 25 Saenari-ro, Bundang-gu, Seongnam-si, Gyeonggi-  
do 13509, South Korea

<sup>+</sup> These authors contributed equally to this work

\* Corresponding author: [hyunmi@snu.ac.kr](mailto:hyunmi@snu.ac.kr) and [kibum@snu.ac.kr](mailto:kibum@snu.ac.kr)

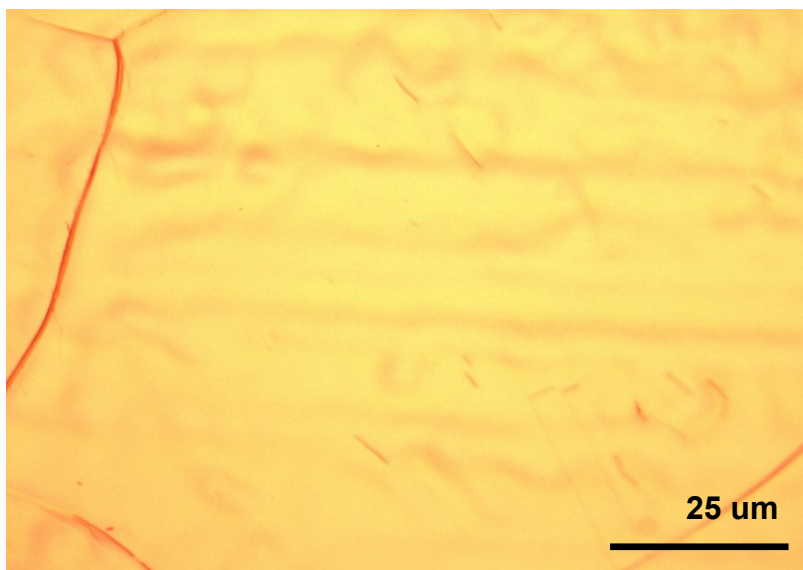

**Supplementary S- I** . Optical microscope image of as-grown single-layer graphene on Cu foil.

Except for the Cu grain boundaries, there is no optical contrast observed as graphene defects.

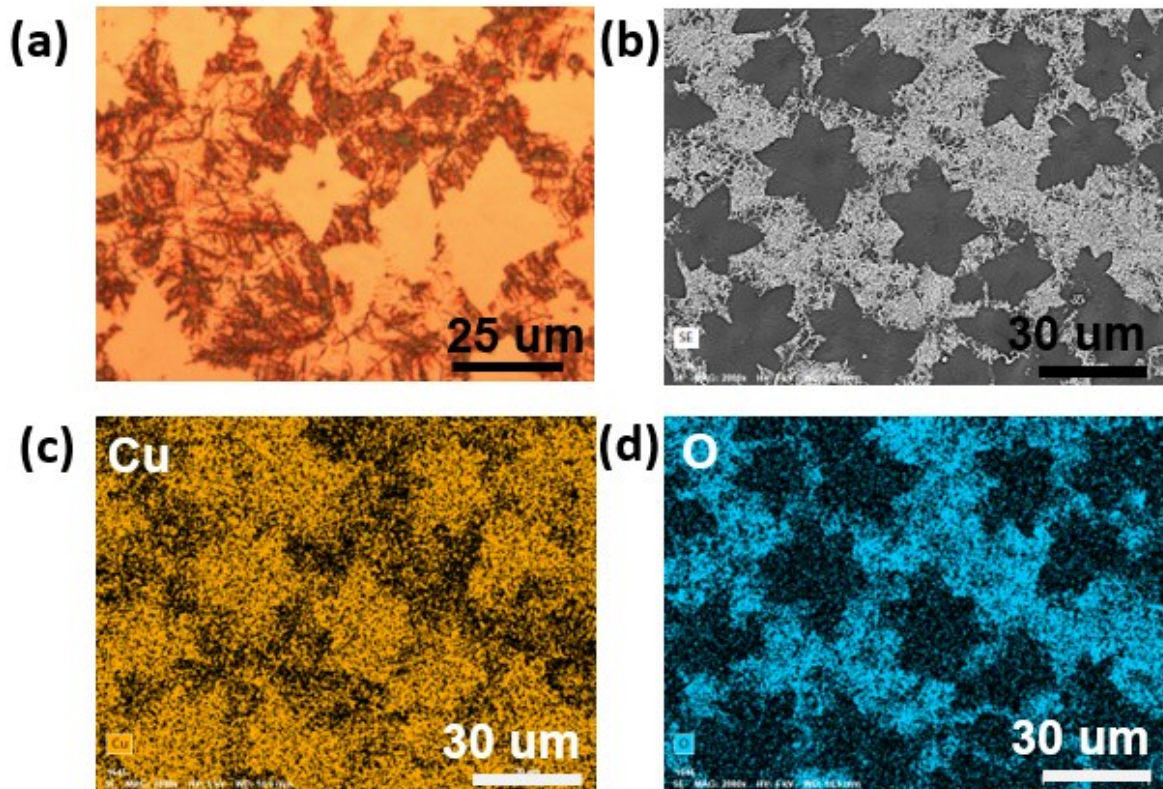

**Supplementary S-II.** (a) Optical microscopy image and (b) SEM image of sample oxidized at 220 °C for 1 hour. EDS mapping image of (b), representing Cu (c) and O (d) element, respectively.

SEM and EDS analysis were conducted to identify the dark contrast in Fig. S-II (a). The dark contrast corresponds to the white contrast in SEM image in Fig. S-II (b). The EDS mapping result shows that the white contrast in SEM image consist of Cu and O element, otherwise, dark area in SEM image is solely composed of Cu element. This means that white contrast in SEM has the Cu oxide phase, and dark contrast has only Cu phase.

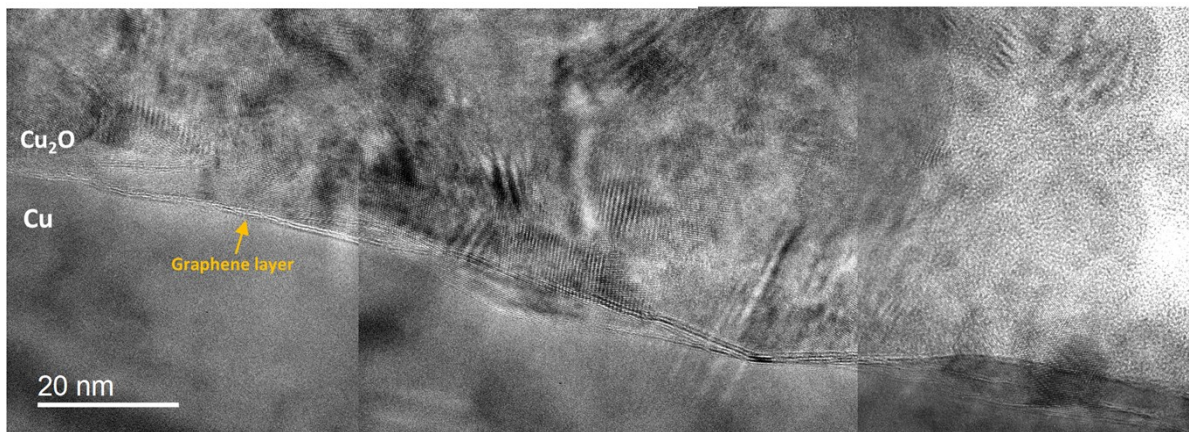

**Supplementary S-III.** Cross-sectional HRTEM image at the interface between Cu and Cu<sub>2</sub>O

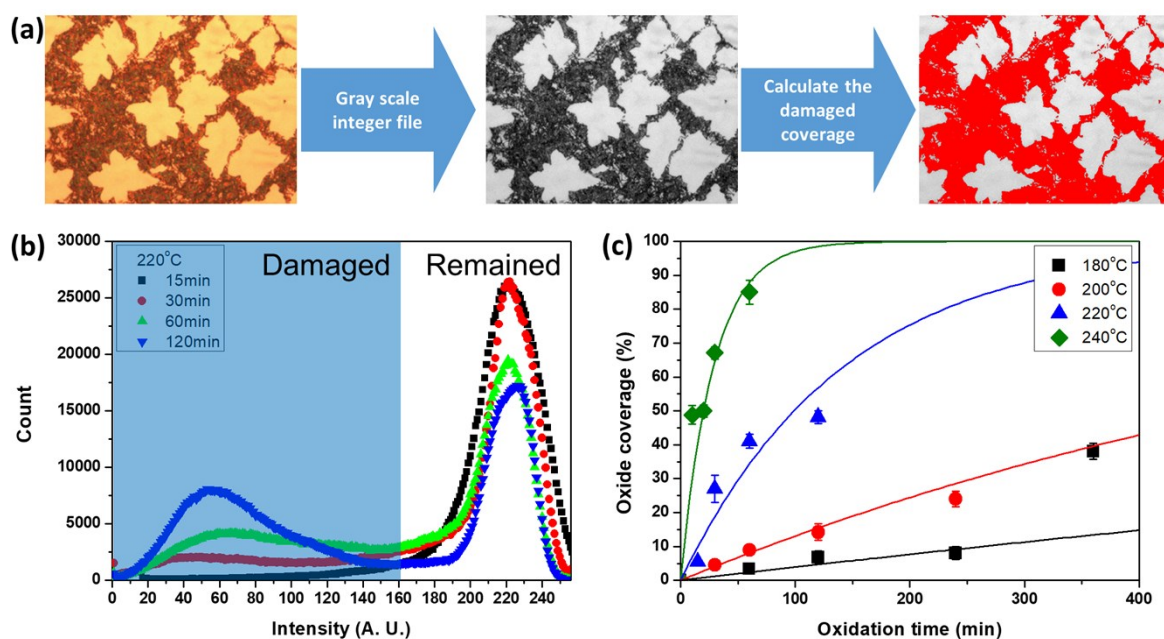

**Supplementary S-IV.** (a) RGB colored optical image file is converted to an integer file with 256-gray scale. (b) The count of damaged pixels is extracted from the intensity histogram and (c) it is divided by the total number of pixels to obtain the oxide coverage.



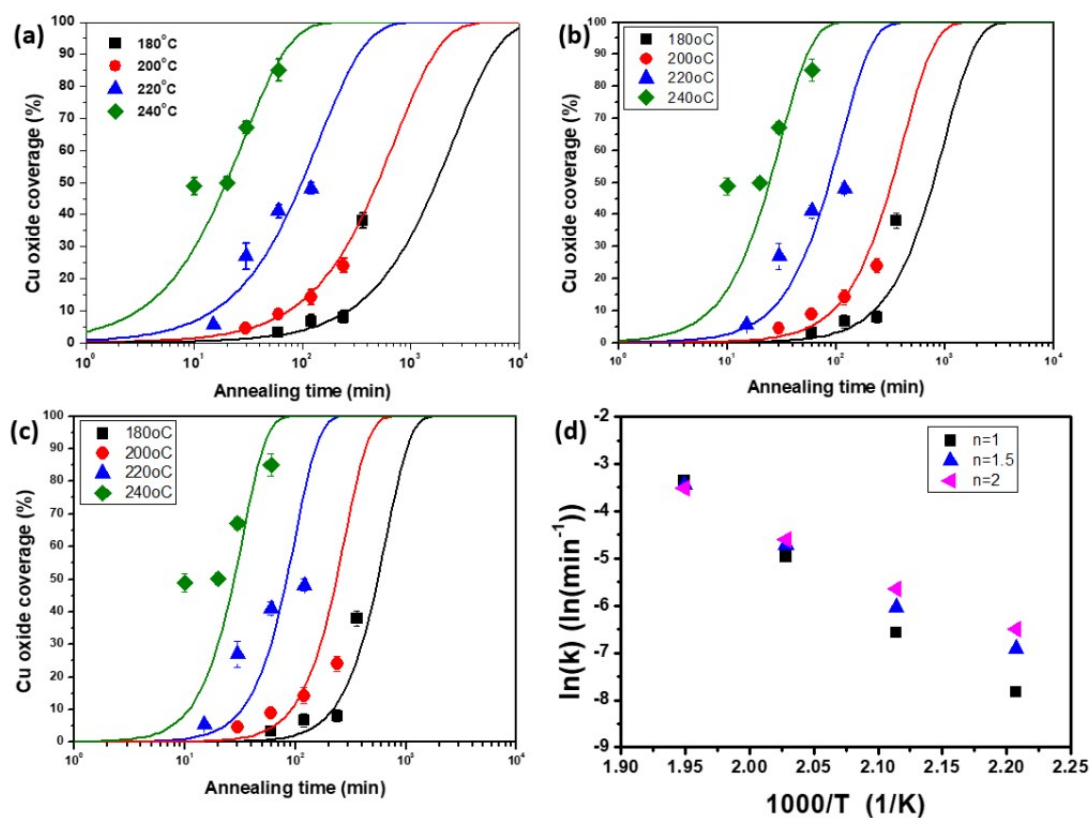

**Supplementary S- V .** JMAK fitting for various n value. (a) n=1, (b) n=1.5, (c) n=2. (d) Oxidation reaction constant as a function of  $1/T$  for various n value. The activation energies were calculated as 1.54, 1.15 and 1.00 eV, respectively. It is confirmed that the fitting result is most well matched in n=1 and the activation energy also most similar to that of reported value at the n=1.

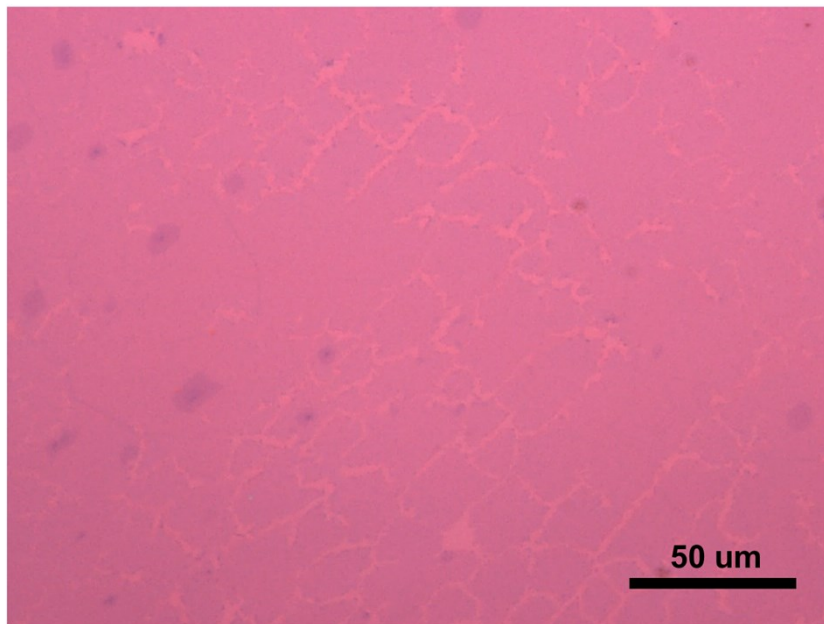

**Supplementary S-VI.** Optical image of graphene transferred to SiO<sub>2</sub>/Si substrate

**Supplementary S-VII.** We attached separate moving image
